# Supplementary material for: Association of a Specific OsCULLIN3c Haplotype with Salt Stress Responses in Local Thai Rice
Source: MDPI journal article supplement (doi:10.3390/ijms25021040), 2024-01-15
Supplement: s1 [file s1]

# **Supporting Information for: Association of a Specific *OsCULLIN3c* Haplotype with Salt Stress Responses in Local Thai Rice**

**Bagus Herwibawa, Chakkree Lekklar, Supachitra  
Chadchawan, and Teerapong Buaboocha**

**Faculty of Science, Chulalongkorn University, Bangkok 10330, Thailand**

**E-mail: [teerapong.b@chula.ac.th](mailto:teerapong.b@chula.ac.th)**

# Supplementary figures and tables

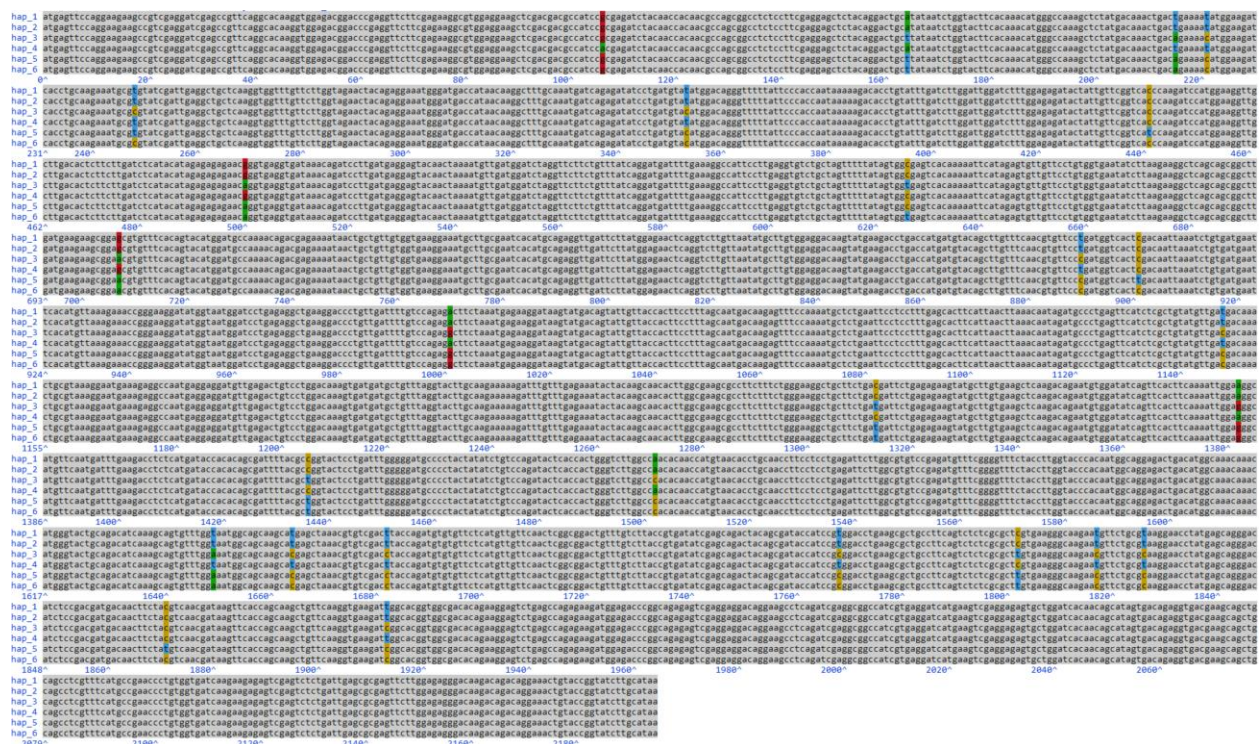

**Figure S1.** Coding sequence (CDS)-based haplotypes alignment showing conservation of codons. Variant triplet codes/codons are marked with colors.



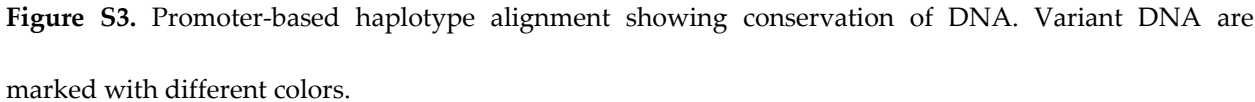

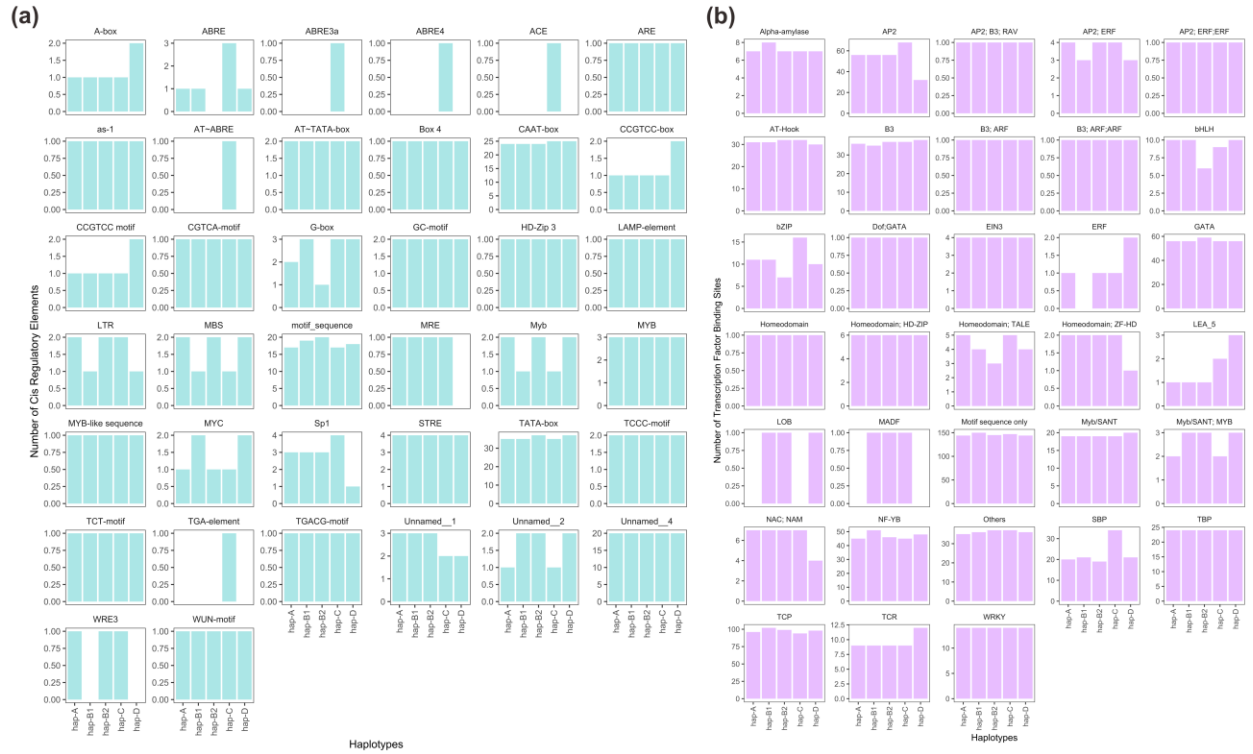

**Figure S4. (a)** The predicted cis-regulatory elements (CREs) and **(b)** transcription factor binding sites (TFBSs) in the putative promoter sequences of *OsCUL3c*.



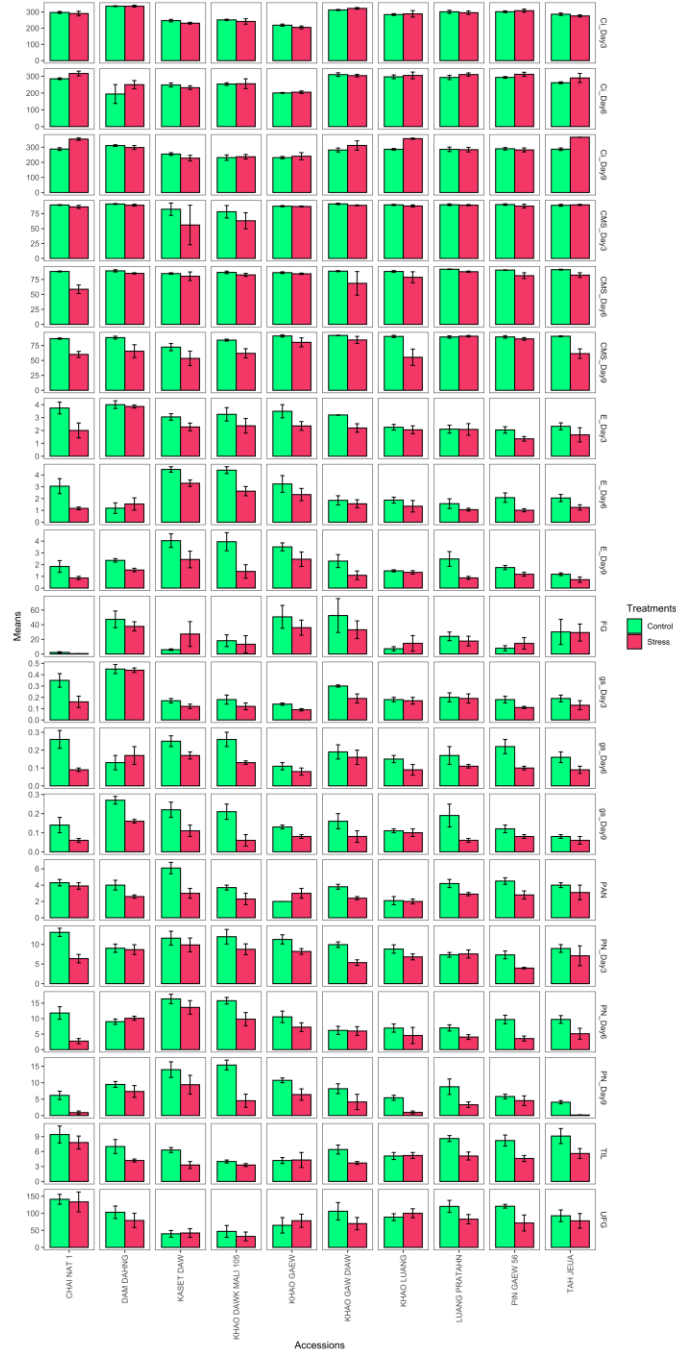

**Figure S5.** Phenotypes measured in haplotype representatives evaluated under salinity-stress treatment (150 mM NaCl). FG, number of filled grains; PAN, number of panicles; TIL, number of tillers; CMS, cell membrane stability (%);  $P_n$ , net photosynthetic rate ( $\mu\text{mol CO}_2 \text{ m}^{-2} \text{ s}^{-1}$ );  $g_s$ , stomatal conductance ( $\text{mol CO}_2 \text{ m}^{-2} \text{ S}^{-1}$ ); E, transpiration rate ( $\text{mmol H}_2\text{O m}^{-2} \text{ S}^{-1}$ ); Ci, intercellular  $\text{CO}_2$  concentration ( $\mu\text{mol mol}^{-1}$ ) [12].

**Table S1 - A set of 233 accessions of local Thai rice used in this study**

| Acc. | Name of acc.                | Acc. | Name of acc.        | Acc. | Name of acc.                         | Acc. | Name of acc.           |
|------|-----------------------------|------|---------------------|------|--------------------------------------|------|------------------------|
| 1    | NIC39                       | 73   | Khao Supan          | 145  | Leb Nok                              | 217  | Gam Liaw               |
| 2    | Leuang Nuan 807             | 74   | Jed Ruang74         | 146  | Puang Ngern                          | 218  | Gam Feuang             |
| 3    | Tah Mahk 102-10-5           | 75   | Jed Ruang75         | 147  | Lai Maejo                            | 219  | Lai Mahk               |
| 4    | Bahng Pra 166               | 76   | Khao Tah Haeng 17   | 148  | Khao Tah Haeng 17                    | 220  | Loi Hah Ruang          |
| 5    | Khao Nah Prang 126-18E-160  | 77   | Khao Gaew           | 149  | Jed Ruang                            | 221  | Chaw Pli Khao          |
| 6    | Pak Sian 199-33-30          | 78   | Khao Tah Haeng      | 150  | Aew Mod Daeng                        | 222  | Niaw Dam Rai           |
| 7    | Leuang 1-6                  | 79   | Khao Gaew           | 151  | Pradoo Daeng                         | 223  | Khao' Gam              |
| 8    | Sai Bua 59-106-2            | 80   | Khao Gaew           | 152  | San-Pah-Tawng Luang                  | 224  | Tab Tim Chumpae (RD69) |
| 9    | BKN55-11-108                | 81   | Khao Kaset          | 153  | Loei                                 | 225  | Khao' Hawm Tai Wan     |
| 10   | BKN57-8-332                 | 82   | Wad Boat            | 154  | Khao' Glam                           | 226  | RR41                   |
| 11   | Khao Ngah Chahng 107-16-111 | 83   | Rawd Ni             | 155  | Jek Chuey                            | 227  | Saeng Lisaw            |
| 12   | Unknown                     | 84   | E-Khawd             | 156  | Alham                                | 228  | Ble La                 |
| 13   | Khao Maled Lek              | 85   | Leuang Nawng Kai    | 157  | Nguang Chahng                        | 229  | Hawm Supan             |
| 14   | Leuang Tah Aiam             | 86   | Gahn Mayom          | 158  | Mai Daeng                            | 230  | RD43                   |
| 15   | Leuang Rai La Gwian         | 87   | Khao Mana           | 159  | Mali Dam                             | 231  | CH1                    |
| 16   | Ta Nod                      | 88   | Leuang Sung         | 160  | Mali                                 | 232  | CH4                    |
| 17   | Tah Khui                    | 89   | Setti               | 161  | E-Khiaw Nawn Tung                    | 233  | Chai Nat 1             |
| 18   | Tawng Kam                   | 90   | Jed Ruang90         | 162  | Khao' Niaw Dam Maw                   |      |                        |
| 19   | Jampah Sawm                 | 91   | Jed Ruang91         | 163  | Khao' Niaw Dam Chaw Mai Pai          |      |                        |
| 20   | Leuang Bai Man              | 92   | Khao Luang          | 164  | Khao' Niaw Daeng Graham Raed         |      |                        |
| 21   | Khao' Kad                   | 93   | Jed Ruang           | 165  | Khao' Niaw Dam 4                     |      |                        |
| 22   | Hua Kan-nah                 | 94   | Unknown             | 166  | Hawm Nahng Nuan                      |      |                        |
| 23   | Wad Jan                     | 95   | Payah Chom          | 167  | Gam Nai Prom                         |      |                        |
| 24   | Gra Pow                     | 96   | Khao Tah Haeng96    | 168  | Meuang Nan                           |      |                        |
| 25   | Khao' Prae                  | 97   | Khao Tah Haeng97    | 169  | Gam Chiang Mai Ton Khiaw             |      |                        |
| 26   | Bai Si                      | 98   | Khao Praguad        | 170  | Niaw Dam Hawm Poo Khiaw              |      |                        |
| 27   | Khao Prajuab                | 99   | RD27                | 171  | Daeng Hawm Gulahb                    |      |                        |
| 28   | Khao Puang                  | 100  | Khao Maled Lek      | 172  | Bahng Taen                           |      |                        |
| 29   | Khao Luang                  | 101  | Leuang Awn          | 173  | Daw Daeng                            |      |                        |
| 30   | Gaew                        | 102  | Khao Tah Mon        | 174  | Pra In                               |      |                        |
| 31   | Sawng Ruang                 | 103  | Pluk Sek            | 175  | Kaset Daw                            |      |                        |
| 32   | Khao' Luang Jaek            | 104  | Yai Graeng          | 176  | Nahng Gerd                           |      |                        |
| 33   | Khao' Chawad                | 105  | Setti Nawk          | 177  | Daw Yuan                             |      |                        |
| 34   | Khiaw Yai                   | 106  | Khao Tah Mon        | 178  | Kam Pai                              |      |                        |
| 35   | Tawng Mah Eng               | 107  | Payah Chom          | 179  | Lon Lao                              |      |                        |
| 36   | Leuang Ton Khaeng           | 108  | Leuang Lah          | 180  | Gled Tow                             |      |                        |
| 37   | Leuang Huan                 | 109  | Leuang Awn          | 181  | Khitom Luang                         |      |                        |
| 38   | Leuang Hahng Mah            | 110  | Pin Tawng           | 182  | Plah Kheng                           |      |                        |
| 39   | Ti Nueng                    | 111  | Jek Chuey           | 183  | Lawd Gwian                           |      |                        |
| 40   | Puang Nahk                  | 112  | Khao Tah Jeua       | 184  | E-Meud                               |      |                        |
| 41   | Jek Chuey                   | 113  | Leuang Roi-et       | 185  | Bua Luang                            |      |                        |
| 42   | Khao Gaw Diaw               | 114  | Khao Choo Chahd     | 186  | It Khao                              |      |                        |
| 43   | Khao Tah Ex                 | 115  | Khwan Chai          | 187  | Khao' Pan                            |      |                        |
| 44   | Hawm Surin                  | 116  | Khao Tah Jeua       | 188  | Ma Fai Dam                           |      |                        |
| 45   | Khao Hah Roi                | 117  | Leuang Roi-et (1)   | 189  | Pa-gah Am-puen                       |      |                        |
| 46   | Supanburi 1                 | 118  | Leuang Awn Bow      | 190  | Mali Daeng Bow                       |      |                        |
| 47   | Pin Gaew                    | 119  | Hawm Mali           | 191  | Mali Daeng San Nak                   |      |                        |
| 48   | Rawd Ni                     | 120  | Maled Lek Bow       | 192  | Mali Daeng Yao Nak                   |      |                        |
| 49   | Nok Kao                     | 121  | Khao Pahk Grabawk   | 193  | Nahng Dam                            |      |                        |
| 50   | Med Ma Kheua                | 122  | Hawm Mali122        | 194  | Sahm Si                              |      |                        |
| 51   | Pin Gaew Bow 17-4-27        | 123  | Hawm Mali123        | 195  | Hawm Mali Daeng                      |      |                        |
| 52   | OIC5 III                    | 124  | Khao Med Lek        | 196  | Khao' Gam                            |      |                        |
| 53   | Leuang Awn 151              | 125  | Khao Gaw Diaw       | 197  | Leuang Bahn Sang                     |      |                        |
| 54   | Gon Jud 8-4-118             | 126  | Niaw Bai Si         | 198  | Dawk Mai Jan                         |      |                        |
| 55   | Ngah Chahng 372             | 127  | Khao Mali           | 199  | Leuang Awn                           |      |                        |
| 56   | Klah 199-12-15              | 128  | Khao Dawk Mali 105  | 200  | Khao Nahng Mon                       |      |                        |
| 57   | Re Hawm 110-26-77           | 129  | Khao Mali129        | 201  | Pathumthani 1                        |      |                        |
| 58   | Khao Bow 466-2-279          | 130  | Khao Mali130        | 202  | Niaw Sew Daeng                       |      |                        |
| 59   | BKN55-8-501                 | 131  | Khao Tod Lawng      | 203  | Hawm Gra-dang-ngah                   |      |                        |
| 60   | Khao Kaset                  | 132  | Gow Ruang 17-2-106  | 204  | Gam Nahng Pa-yah                     |      |                        |
| 61   | Khua Niaw                   | 133  | Pin Gaew 13-24-13   | 205  | Rathu Heenati                        |      |                        |
| 62   | Jampah                      | 134  | Bahng Pra           | 206  | Hawm Gulahb Daeng                    |      |                        |
| 63   | Sabparod                    | 135  | Puang Nahk 16       | 207  | Hawm Daeng (Photoperiod insensitive) |      |                        |
| 64   | Toon Chalawng               | 136  | Khao Jampi 54-8-60  | 208  | Sang Yod                             |      |                        |
| 65   | Nahng Bun Mee               | 137  | Nam Dawk Mai 595    | 209  | Hawm Mali Daeng                      |      |                        |
| 66   | Ruang Diaw                  | 138  | Pin Gaew 56         | 210  | Nok Kum                              |      |                        |
| 67   | Gaen Jan                    | 139  | Nahng Mon S-4       | 211  | Mae Pa-yah Tawng Dam                 |      |                        |
| 68   | Tah Jeua                    | 140  | Nahng Chalawng      | 212  | Hawm Nin                             |      |                        |
| 69   | Khao Tah Haeng              | 141  | Chaw Ma Gawk Klahng | 213  | Gam Noi                              |      |                        |
| 70   | Khao Tah Haeng              | 142  | Khao Gaw Diaw       | 214  | Mali Dam                             |      |                        |
| 71   | Setti                       | 143  | Ma Hah Wong         | 215  | Riceberry                            |      |                        |
| 72   | Luang Pratahn               | 144  | Niaw Khiaw Ngoo     | 216  | Dam Dahng                            |      |                        |

Notes: same name with different accessions number indicates different genomic sequence (GS) number

**Table S2 - Haplotype groups and local Thai rice accessions.**

| Haplotype | Accessions                                                                                                            | Frequency |
|-----------|-----------------------------------------------------------------------------------------------------------------------|-----------|
| Hap 1     | 1;10;102;105;113;117;120;125;128;130;131;138;159;167;170;18;189;192;194;196;199;204;210;215;226;23;25;30;44;5;54;63;8 | 33        |
| Hap 2     | 112;114;115;118;119;123;129;13;14;142;149;15;151;154;155;179;181;190;195;197;212;213;3;35;36;47;55;60;68;7            | 30        |
| Hap 3     | 108;11;110;12;124;135;137;161;2;207;223;29;37;39;4;42;43;48;49;51;61;72;82;86;88;90;93                                | 27        |
| Hap 4     | 104;111;121;136;147;153;169;175;182;202;205;206;208;21;216;218;233;24;34;38                                           | 20        |
| Hap 5     | 219;70;76;77;78;79;80;81;87;9;96;97                                                                                   | 12        |
| Hap 6     | 162;163;201;225;227;228;230;231;232;46                                                                                | 10        |
| Hap 7     | 172;69;75;91;92                                                                                                       | 5         |
| Hap 8     | 145;156;203;221                                                                                                       | 4         |
| Hap 9     | 126;184;186;193                                                                                                       | 4         |
| Hap 10    | 144;26;53;64                                                                                                          | 4         |
| Hap 11    | 165;178;217;229                                                                                                       | 4         |
| Hap 12    | 132;173;31;94                                                                                                         | 4         |
| Hap 13    | 116;122;65;99                                                                                                         | 4         |
| Hap 14    | 134;171;32                                                                                                            | 3         |
| Hap 15    | 183;22;56                                                                                                             | 3         |
| Hap 16    | 139;211                                                                                                               | 2         |
| Hap 17    | 198;45                                                                                                                | 2         |
| Hap 18    | 222                                                                                                                   | 1         |
| Hap 19    | 101                                                                                                                   | 1         |
| Hap 20    | 83                                                                                                                    | 1         |
| Hap 21    | 74                                                                                                                    | 1         |
| Hap 22    | 103                                                                                                                   | 1         |
| Hap 23    | 84                                                                                                                    | 1         |
| Hap 24    | 100                                                                                                                   | 1         |
| Hap 25    | 95                                                                                                                    | 1         |
| Hap 26    | 164                                                                                                                   | 1         |
| Hap 27    | 150                                                                                                                   | 1         |
| Hap 28    | 148                                                                                                                   | 1         |
| Hap 29    | 89                                                                                                                    | 1         |
| Hap 30    | 59                                                                                                                    | 1         |
| Hap 31    | 71                                                                                                                    | 1         |
| Hap 32    | 200                                                                                                                   | 1         |
| Hap 33    | 188                                                                                                                   | 1         |
| Hap 34    | 166                                                                                                                   | 1         |
| Hap 35    | 187                                                                                                                   | 1         |
| Hap 36    | 20                                                                                                                    | 1         |
| Hap 37    | 98                                                                                                                    | 1         |
| Hap 38    | 66                                                                                                                    | 1         |
| Hap 39    | 107                                                                                                                   | 1         |
| Hap 40    | 6                                                                                                                     | 1         |
| Hap 41    | 185                                                                                                                   | 1         |
| Hap 42    | 17                                                                                                                    | 1         |
| Hap 43    | 141                                                                                                                   | 1         |
| Hap 44    | 73                                                                                                                    | 1         |
| Hap 45    | 214                                                                                                                   | 1         |
| Hap 46    | 41                                                                                                                    | 1         |
| Hap 47    | 152                                                                                                                   | 1         |
| Hap 48    | 143                                                                                                                   | 1         |
| Hap 49    | 57                                                                                                                    | 1         |
| Hap 50    | 177                                                                                                                   | 1         |
| Hap 51    | 168                                                                                                                   | 1         |
| Hap 52    | 174                                                                                                                   | 1         |
| Hap 53    | 109                                                                                                                   | 1         |
| Hap 54    | 224                                                                                                                   | 1         |
| Hap 55    | 62                                                                                                                    | 1         |
| Hap 56    | 19                                                                                                                    | 1         |
| Hap 57    | 160                                                                                                                   | 1         |
| Hap 58    | 157                                                                                                                   | 1         |
| Hap 59    | 67                                                                                                                    | 1         |
| Hap 60    | 27                                                                                                                    | 1         |
| Hap 61    | 28                                                                                                                    | 1         |
| Hap 62    | 180                                                                                                                   | 1         |
| Hap 63    | 33                                                                                                                    | 1         |
| Hap 64    | 16                                                                                                                    | 1         |
| Hap 65    | 40                                                                                                                    | 1         |
| Hap 66    | 127                                                                                                                   | 1         |
| Hap 67    | 140                                                                                                                   | 1         |
| Hap 68    | 106                                                                                                                   | 1         |
| Hap 69    | 50                                                                                                                    | 1         |
| Hap 70    | 209                                                                                                                   | 1         |
| Hap 71    | 146                                                                                                                   | 1         |
| Hap 72    | 85                                                                                                                    | 1         |
| Hap 73    | 133                                                                                                                   | 1         |
| Hap 74    | 220                                                                                                                   | 1         |
| Hap 75    | 191                                                                                                                   | 1         |
| Hap 76    | 158                                                                                                                   | 1         |
| Hap 77    | 58                                                                                                                    | 1         |
| Hap 78    | 52                                                                                                                    | 1         |
| Hap 79    | 176                                                                                                                   | 1         |



**Table S3** - Primers used for RT-qPCR validation

| <b>Primer name</b> | <b>Type</b> | <b>Primer sequence (5' -&gt; 3')</b> | <b>Tm (°C)</b> | <b>Product size (bp)</b> |
|--------------------|-------------|--------------------------------------|----------------|--------------------------|
| RT_OsCUL3_F        | Forward     | ACCAGCAAGCTGTTCAAGGT                 | 57.1           | 188                      |
| RT_OsCUL3_R        | Reverse     | TGCTTCGTCACCTCTGTCAC                 | 57.1           |                          |
| OsEF-1 $\alpha$ _F | Forward     | ATGGTTGTGGAGACCTTC                   | 53.7           | 127                      |
| OsEF-1 $\alpha$ _R | Reverse     | TCACCTTGGCACC GGTTG                  | 58.2           |                          |
